# Supplementary material
Source: publisher figshare collection journal article supplement (https://tandf.figshare.com/articles/dataset/_/11853477)
Supplement: Supplementary file 2 [file 1]

**Table S1. Distribution of clinical test characteristics for different cut-off values for CEA and CA19-9.**

|                                        | Number of patients<br>(% of total) | Patients who underwent resection<br>(resection rate [%]) | Sensitivity (%) | Specificity (%) | PPV (%)     | NPV (%)     |
|----------------------------------------|------------------------------------|----------------------------------------------------------|-----------------|-----------------|-------------|-------------|
| <b>CEA (N=217)</b>                     |                                    |                                                          |                 |                 |             |             |
| >3.0                                   | 139 (64.1)                         | 50 (36.0)                                                | 70.1            | 44.4            | 64.0        | 51.3        |
| >5.0                                   | 85 (39.2)                          | 19 (22.3)                                                | 52.0            | 78.9            | 77.6        | 53.8        |
| <b>&gt;7.0</b>                         | <b>66 (30.4)</b>                   | <b>11 (16.7)</b>                                         | <b>43.3</b>     | <b>87.8</b>     | <b>83.3</b> | <b>52.3</b> |
| >10.0                                  | 47 (21.7)                          | 8 (17.0)                                                 | 30.7            | 91.1            | 83.0        | 48.2        |
| >15.0                                  | 35 (16.1)                          | 6 (17.1)                                                 | 22.8            | 93.3            | 82.9        | 46.2        |
| >20.0                                  | 31 (14.3)                          | 4 (12.9)                                                 | 21.3            | 95.6            | 87.1        | 46.2        |
| >25.0                                  | 26 (12.0)                          | 3 (11.5)                                                 | 18.1            | 96.7            | 88.5        | 45.6        |
| >30.0                                  | 20 (9.2)                           | 3 (15.0)                                                 | 13.4            | 96.7            | 85.0        | 44.2        |
| >50.0                                  | 10 (4.6)                           | 0 (0.0)                                                  | 7.9             | 100.0           | 100.0       | 43.5        |
| <b>CA19-9 (N=301)</b>                  |                                    |                                                          |                 |                 |             |             |
| >30.0                                  | 247 (82.1)                         | 91 (36.8)                                                | 86.7            | 24.8            | 63.2        | 55.6        |
| >150.0                                 | 188 (62.5)                         | 61 (32.4)                                                | 70.6            | 49.6            | 67.6        | 53.1        |
| <b>&gt;305.0</b>                       | <b>140 (46.5)</b>                  | <b>37 (26.4)</b>                                         | <b>57.2</b>     | <b>69.4</b>     | <b>73.6</b> | <b>52.2</b> |
| >500.0                                 | 108 (35.9)                         | 31 (28.7)                                                | 42.8            | 74.4            | 71.3        | 46.4        |
| >600.0                                 | 100 (33.2)                         | 26 (26.0)                                                | 41.1            | 78.5            | 74.0        | 47.3        |
| >750.0                                 | 90 (29.9)                          | 24 (26.7)                                                | 36.7            | 80.2            | 73.3        | 46.0        |
| >1000.0                                | 78 (25.9)                          | 19 (24.4)                                                | 32.8            | 84.3            | 75.6        | 45.7        |
| >2000.0                                | 48 (15.9)                          | 10 (20.8)                                                | 21.0            | 91.7            | 79.2        | 43.9        |
| >5000.0                                | 23 (7.6)                           | 3 (13.0)                                                 | 11.1            | 97.5            | 87.0        | 42.5        |
| >10,000.0                              | 13 (4.3)                           | 2 (15.4)                                                 | 6.1             | 98.4            | 84.6        | 41.3        |
| <b>Combined CEA and CA19-9 (N=214)</b> |                                    |                                                          |                 |                 |             |             |
| CEA >3.0 & CA19-9 >30.0                | 111 (51.9)                         | 37 (33.3)                                                | 59.2            | 58.4            | 66.7        | 50.5        |
| CEA >5.0 & CA19-9 >150.0               | 57 (26.6)                          | 11 (19.3)                                                | 36.8            | 87.6            | 80.7        | 49.7        |
| CEA >7.0 & CA19-9 >305.0               | 38 (17.8)                          | 3 (7.9)                                                  | 28.0            | 96.6            | 92.1        | 48.9        |
| CEA >10.0 & CA19-9 >500.0              | 21 (9.8)                           | 2 (9.5)                                                  | 15.2            | 97.8            | 90.5        | 45.1        |
| CEA >15.0 & CA19-9 >600.0              | 17 (7.9)                           | 1 (5.9)                                                  | 12.8            | 98.9            | 94.1        | 44.7        |
| CEA >20.0 & CA19-9 >750.0              | 14 (6.5)                           | 1 (7.1)                                                  | 10.4            | 98.9            | 92.9        | 44.0        |
| CEA >25.0 & CA19-9 >1000.0             | 11 (5.1)                           | 0 (0.0)                                                  | 8.8             | 100.0           | 100.0       | 43.8        |

*CEA: carcinoembryonic antigen; CA19-9: carbohydrate antigen 19-9; PPV: positive predictive value; NPV: negative predictive value.*
